# Supplementary material for: Learning Human-Written Commit Messages to Document Code Changes
Source: Springer Nature journal article supplement (doi:10.1007/s11390-020-0496-0), 2020-11-01
Supplement: 11390_2020_496_MOESM1_ESM.pdf [file 11390_2020_496_MOESM1_ESM.pdf]

# Learning Human-Written Commit Messages to Document Code Changes

Huang Y, Jia N, Zhou HJ et al. Learning human-written commit messages to document code changes.

JOURNAL OF

COMPUTER SCIENCE AND TECHNOLOGY 35(6): 1258–1277 Nov. 2020. DOI 10.1007/s11390-020-0496-0

# Research Objectives

- Commit messages are important complementary information in understanding code changes.
- Many commits in different projects still lack messages.
- A number of work focus on automatically generating commit message.

# Research Method

- This paper proposes ChangeDoc, an approach to reuse existing messages in version control systems for commit message generation.
- For a commit, ChangeDoc recommends the messages of the similar commits to it.

# Research Results

- The results show that 21.5% of the recommended messages by ChangeDoc can be directly used, 62.8% require minor modifications.
- The recommended messages contain important intent information that is not included in the messages generated by other tools.

# Research Conclusions

- The results show that by reusing the commit messages, it is possible to recommend messages to describe current change.
